# Supplementary material for: Detection of the ORF1 Gene Is an Indicator of the Possible Isolation of Severe Acute Respiratory Syndrome Coronavirus 2
Source: MDPI journal article supplement (doi:10.3390/pathogens11030302), 2022-02-27
Supplement: s1 [file s1]

**Table S1.** Specific reaction of the NIID-ORF1a set.

| <b>Virus</b>                | <b>Name of Isolate</b>  | <b>GenBank Accession or GISAID ID</b> | <b>Amount</b>                          | <b>Results</b> |
|-----------------------------|-------------------------|---------------------------------------|----------------------------------------|----------------|
| SARS-CoV-2                  | Japan/TY/WK-521/2020    | EPI_ISL_407084                        | 2.5×10 <sup>5</sup> copies             | +              |
| SARS-CoV                    | Frankfurt-1             | AY291315                              | 5×10 <sup>4</sup> copies               | -              |
| MERS-CoV                    | EMC                     | NC_019843                             | 2.5×10 <sup>5</sup> copies             | -              |
| HCoV-229E                   | VR-740                  | DQ243963                              | 1.8×10 <sup>9</sup> copies             | -              |
|                             | Sendai-H/1121/04        | AB691764                              | 4.9×10 <sup>6</sup> copies             | -              |
|                             | Niigata/01/08           | AB691767                              | 2×10 <sup>5</sup> copies               | -              |
|                             | Fukushima/H829/2020     | LC654445                              | 2.1×10 <sup>7</sup> copies             | -              |
|                             | Fukushima/H832/2020     | LC654446                              | 6.8×10 <sup>8</sup> copies             | -              |
| HCoV-NL63                   | Amsterdam I             | NC_005831                             | 2×10 <sup>9</sup> copies               | -              |
|                             | Tokyo/SGH-15/2017       | LC488390                              | 2.7×10 <sup>6</sup> copies             | -              |
|                             | Tokyo/SGH-24/2018       | LC488388                              | 4.8×10 <sup>5</sup> copies             | -              |
|                             | Fukushima/H219/2018     | LC654455                              | 3.6×10 <sup>7</sup> copies             | -              |
| HCoV-OC43                   | VR-1558                 | AY391777                              | 5.1×10 <sup>10</sup> copies            | -              |
|                             | Tokyo/SGH-36/2014       | LC315646                              | 6.8×10 <sup>7</sup> copies             | -              |
|                             | Tokyo/SGH-61/2014       | LC315647                              | 3.3×10 <sup>8</sup> copies             | -              |
|                             | Tokyo/SGH-06/2015       | LC315648                              | 1.1×10 <sup>8</sup> copies             | -              |
|                             | Tokyo/SGH-65/2016       | LC315649                              | 2.9×10 <sup>8</sup> copies             | -              |
|                             | Fukushima/H148/2018     | LC654454                              | 3.3×10 <sup>7</sup> copies             | -              |
|                             | Fukushima/H189/2018     | LC654453                              | 7.5×10 <sup>8</sup> copies             | -              |
|                             | Fukushima/H478/2019     | LC654452                              | 5.1×10 <sup>9</sup> copies             | -              |
|                             | Fukushima/H509/2019     | LC654451                              | 6.8×10 <sup>8</sup> copies             | -              |
|                             | Fukushima/O120/2017     | LC654450                              | 2.5×10 <sup>9</sup> copies             | -              |
| HCoV-HKU1                   | Tokyo/SGH-15/2014       | LC315650                              | 1.5×10 <sup>8</sup> copies             | -              |
|                             | Tokyo/SGH-18/2016       | LC315651                              | 3.3×10 <sup>7</sup> copies             | -              |
|                             | Fukushima/H815/2020     | LC654447                              | 3.0×10 <sup>8</sup> copies             | -              |
|                             | Fukushima/H821/2020     | LC654448                              | 1.5×10 <sup>7</sup> copies             | -              |
|                             | Fukushima/O943/2020     | LC654449                              | 7.0×10 <sup>6</sup> copies             | -              |
| ADV 3                       | G.B.                    | unregistered                          | 7×10 <sup>5</sup> TCID <sub>50</sub>   | -              |
| ADV 4                       | RI-67                   | KX384949                              | 7×10 <sup>5</sup> TCID <sub>50</sub>   | -              |
| ADV 7                       | Gomen                   | unregistered                          | 7×10 <sup>5</sup> TCID <sub>50</sub>   | -              |
| Human respirovirus<br>1     | PIV1, C-35              | unregistered                          | 4 ×10 <sup>5</sup> copies              | -              |
|                             | PIV1, NIID/79081/1/2019 | LC654457                              | 1.3 ×10 <sup>3</sup> copies            | -              |
|                             | PIV1, NIID/79082/2/2019 | unregistered                          | 2.4 ×10 <sup>4</sup> copies            | -              |
| Human respirovirus<br>3     | PIV3, C-243             | EU346887                              | 5.1 ×10 <sup>7</sup> copies            | -              |
|                             | PIV3, NIID/79133/1/2019 | LC654459                              | 3.6 ×10 <sup>3</sup> copies            | -              |
| Human Rubulavirus<br>2      | PIV2, NIID/56606/2/2019 | LC654458                              | 7.3×10 <sup>2</sup> TCID <sub>50</sub> | -              |
|                             | PIV2, NIID/56607/1/2019 | unregistered                          | 7.3×10 <sup>1</sup> TCID <sub>50</sub> | -              |
| <b>Influenza viruses</b>    |                         |                                       |                                        |                |
| H1N1pdm                     | A/California/7/2009     | unregistered                          | 1×10 <sup>5</sup> copies               | -              |
| H3N2                        | A/Victoria/210/2009     | unregistered                          | 8.4×10 <sup>4</sup> copies             | -              |
| B                           | B/Brisbane/60/2008      | unregistered                          | 4.2×10 <sup>5</sup> copies             | -              |
| Human orthopneu-<br>movirus | RSV, Long               | AY911262                              | 5.7×10 <sup>4</sup> copies             | -              |
|                             | RSV, A2                 | KT992094                              | 2.5 ×10 <sup>6</sup> copies            | -              |
|                             | RSV, CH/18537           | JX198143                              | 4.8×10 <sup>5</sup> copies             | -              |
|                             | RSV, B1                 | AF013254                              | 2.5 ×10 <sup>3</sup> copies            | -              |

|                       |                    |              |                           |   |
|-----------------------|--------------------|--------------|---------------------------|---|
|                       | RSV/A/NIID/2347/14 | LC474556     | 5 ×10 <sup>4</sup> copies | - |
|                       | RSV/A/NIID/2367/14 | LC474557     | 5 ×10 <sup>4</sup> copies | - |
|                       | RSV/A/NIID/2370/14 | LC474558     | 5 ×10 <sup>4</sup> copies | - |
|                       | RSV/B/NIID/2472/14 | LC474559     | 5 ×10 <sup>4</sup> copies | - |
|                       | RSV/B/NIID/2474/14 | LC474560     | 5 ×10 <sup>4</sup> copies | - |
| Human metapneumovirus | IA10-2003          | DQ312451     | 7.5 ×10 <sup>6</sup> IU   | - |
|                       | Sendai/0256/2015   | unregistered | 2 ×10 <sup>5</sup> IU     | - |
|                       | Sendai/414/2013    | unregistered | 3 ×10 <sup>6</sup> FFU    | - |
|                       | Sendai/1052/2011   | unregistered | 3 ×10 <sup>6</sup> IU     | - |

**Table S2.** Detection of SARS-CoV-2 by the NIID-ORF1a set in clinical specimens.

| Specimen No. | NIID-N2 | NIID-S2 | NIID-ORF1a |
|--------------|---------|---------|------------|
| 1            | -       | -       | -          |
| 2            | -       | -       | -          |
| 3            | -       | -       | -          |
| 4            | -       | -       | -          |
| 5            | -       | -       | -          |
| 6            | -       | -       | -          |
| 7            | -       | -       | -          |
| 8            | -       | -       | -          |
| 9            | -       | -       | -          |
| 10           | -       | -       | -          |
| 11           | -       | -       | -          |
| 12           | -       | -       | -          |
| 13           | -       | -       | -          |
| 14           | -       | -       | -          |
| 15           | -       | -       | -          |
| 16           | 23.3    | 24.15   | 26.44      |
| 17           | 25.08   | 25.87   | 28.58      |
| 18           | 27.4    | 28.15   | 30.7       |
| 19           | 29.68   | 30.57   | 33.19      |
| 20           | 29.65   | 30.46   | 32.73      |
| 21           | 28.91   | 30.43   | 32.75      |
| 22           | 30.51   | 32.16   | 35.19      |
| 23           | 32.70   | 33.54   | 37.58      |
| 24           | 35.86   | 36.14   | -          |
| 25           | 36.19   | 38.53   | -          |

Cp values were shown.

**Table S3.** Primer/probe mismatches on NIID assays for Omicron variant.

| Primer/Probe Set |         | The Number of Available Sequences | The Number of Mismatched Sequences | Rate (%) | Distinctive Mismatch                                                                                        | The Number of Mismatched Sequences | Rate (%) |
|------------------|---------|-----------------------------------|------------------------------------|----------|-------------------------------------------------------------------------------------------------------------|------------------------------------|----------|
| NIID-N2          | Forward | 347,853                           | 527                                | 0.152    |                                                                                                             |                                    |          |
|                  | Probe   | 345,046                           | 411                                | 0.119    |                                                                                                             |                                    |          |
|                  | Reverse | 347,724                           | 944                                | 0.271    |                                                                                                             |                                    |          |
|                  | Total   |                                   | 1882                               | 0.542    |                                                                                                             |                                    |          |
| NIID-S2          | Forward | 347,624                           | 140                                | 0.040    | T to G substitution on 11th nucleotide<br>(TGCTCCTGCCATTTGTCATGATGG<br>→TGCTCCTGCC <u>G</u> TTTGTTCATGATGG) | 5341                               | 1.537    |
|                  | Probe   | 347,520                           | 6262                               | 1.802    |                                                                                                             |                                    |          |
|                  | Reverse | 347,845                           | 346                                | 0.002    |                                                                                                             |                                    |          |
|                  | Total   |                                   | 6748                               | 1.844    |                                                                                                             |                                    |          |
| NIID-ORF1a       | Forward | 287,892                           | 34,845                             | 12.103   | T to G substitution on 18th nucleotide<br>(GGAGCTGGTGGCCATAGTTA<br>→GGAGCTGGTGGCCATAG <u>G</u> TA)          | 34,108                             | 11.847   |
|                  | Probe   | 287,925                           | 469                                | 0.163    |                                                                                                             |                                    |          |
|                  | Reverse | 287,802                           | 425                                | 0.148    |                                                                                                             |                                    |          |
|                  | Total   |                                   | 35,739                             | 12.414   |                                                                                                             |                                    |          |
